# Supplementary material
Source: PubMed Central journal article supplement (PMC4249272)
Supplement: IAI.02124-14_zii999090970so1.pdf [file IAI.02124-14_zii999090970so1.pdf]

381

382

383

384 **Supplementary Figures:**

385

386

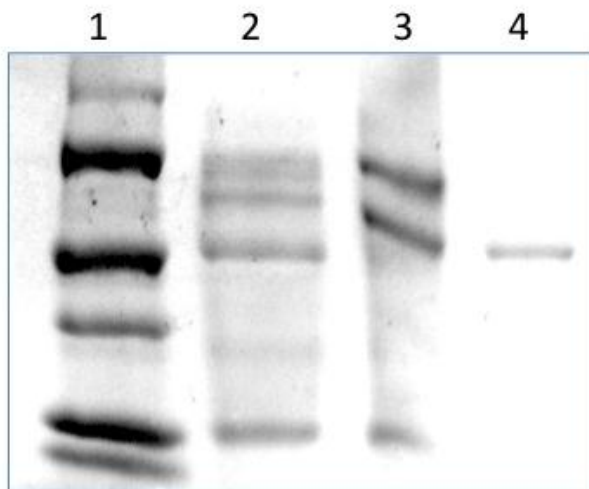

387

388

389 **Supplementary figure S1:** SDS-PAGE of Fab preparation. Shown here is the papain digestion  
390 of purified Anti-PhtD antibodies. Lane 2 is purified Anti-PhtD antibodies. Lane 3 is same sample  
391 in reduced form. Lane 4 is anti-PhtD Fab after purification indicating reaction is complete and  
392 pure. Lane 1: molecular weight markers.
