# Supplementary material
Source: PubMed Central journal article supplement (PMC4249272)
Supplement: IAI.02124-14_zii999090970so2.pdf [file IAI.02124-14_zii999090970so2.pdf]

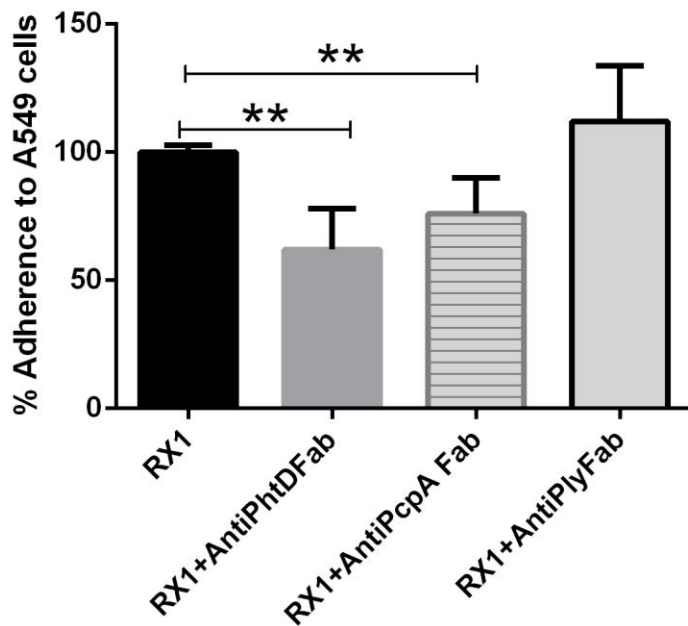

393

394 **Supplementary figure S2:** Decrease in adherence of RX1 strain of *Streptococcus pneumoniae* to  
 395 A549 cells with treatment of 0.5 µg of anti-PhtD and anti-PcpA Fab. The mean adherence of  
 396 RX1 on A549 cells was normalized to 100% and the % adherence of RX1 with anti-PhtD, PcpA  
 397 and Ply Fabs is compared to RX1 alone. Data represent the mean with standard deviation of two  
 398 experiments in triplicate. \*\* Symbols mean p value of <0.01.

399
