# Supplementary material
Source: PubMed Central journal article supplement (PMC4249272)
Supplement: IAI.02124-14_zii999090970so3.pdf [file IAI.02124-14_zii999090970so3.pdf]

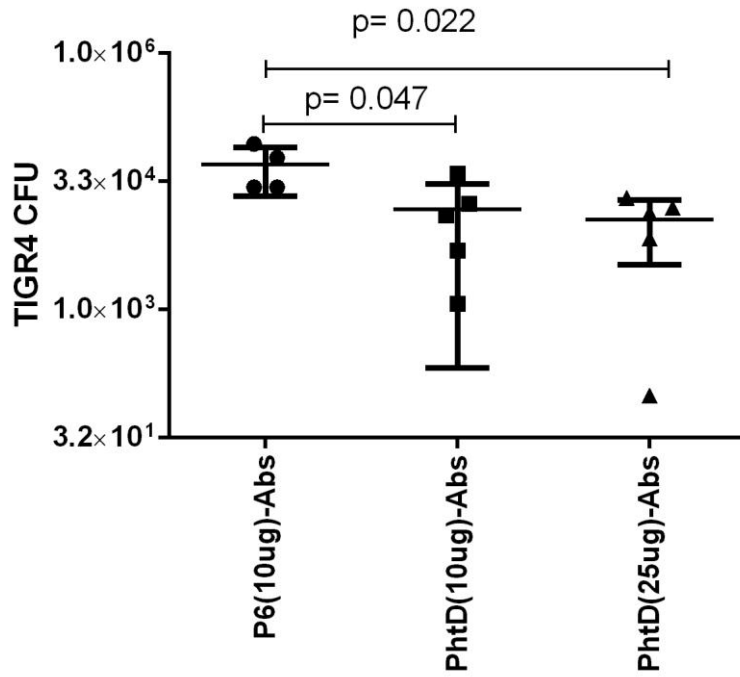

400

401 **Supplementary figure S3:** Decrease in *Spn* colonization with passive transfer of two different  
 402 doses of anti-PhtD antibodies (10 $\mu$ g and 25 $\mu$ g). Both doses showed significant reduction in  
 403 CFU/ml compared to control group. PcpA and Ply did not show significant difference with 10  $\mu$ g  
 404 dose (not shown).
