# Supplementary material
Source: PubMed Central journal article supplement (PMC4249272)
Supplement: IAI.02124-14_zii999090970so4.pdf [file IAI.02124-14_zii999090970so4.pdf]

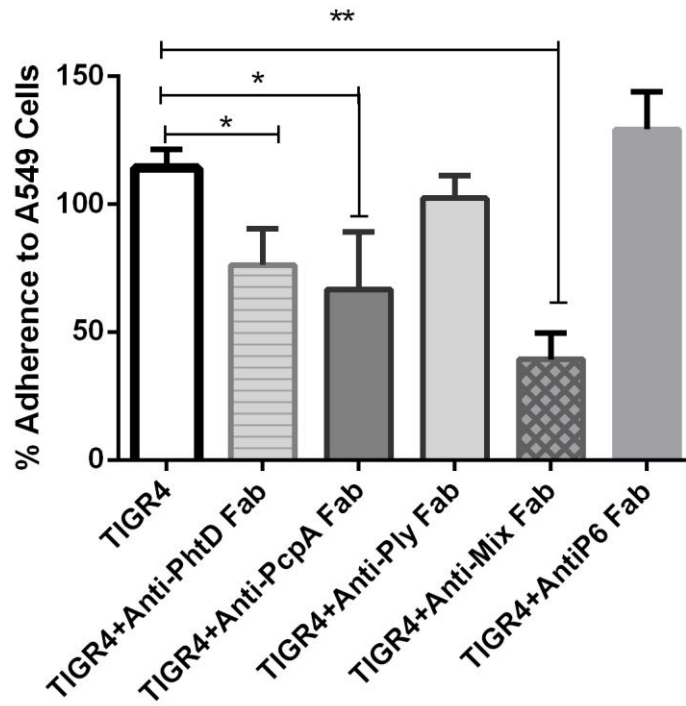

405

406 **Supplementary figure S4:** Decrease in adherence of TIGR4 strain of *Streptococcus pneumoniae*

407 to A549 cells with treatment of 1  $\mu$ g of anti-PhtD and anti-PcpA Fab. The mean CFU adherence

408 of TIGR4 on A549 cells was normalized to 100% and the % adherence of TIGR4 with anti-

409 PhtD, PcpA, Ply and mix Fabs (1  $\mu$ g each of anti-PhtD, -PcpA and -Ply) is compared to TIGR4

410 alone. As a non-correlated antibody control, 1  $\mu$ g of anti-P6 Fab of *NTHi* were treated with

411 TIGR4 that showed no difference in the CFU to untreated TIGR4. Data represent the mean with

412 standard error of two different experiments in triplicate. \* Symbols mean p value of <0.05 and \*\*

413 symbol mean p value of <0.01.

414

415

416

417
